# Supplementary material
Source: Research Square preprint supplement (doi:10.21203/rs.3.rs-9141783/v1)
Supplement: Supplementary file 1 [file c35adf529f9d089725a2c1d8.docx]

Supplementary Materials

Crosstabulation between Ethnic groups among information about malaria message (Supplementary Table A)

| Statement | Level | Akan | Ga/  Dangme | Ewe | Guan | Mole-  Dagbani | Grusi | Gurma | Mande | Other |  | Sig |  |
| --- | --- | --- | --- | --- | --- | --- | --- | --- | --- | --- | --- | --- | --- |
| Seen or heard any messages about malaria in past 6 months | No | 30.7% | 4.6% | 13.2% | 2.2% | 34.0% | 3.9% | 7.9% | 1.3% | 2.3% | 29.046a | **<0.001** | -0.066 |
| Yes | 36.7% | 5.1% | 11.7% | 2.8% | 31.1% | 3.9% | 4.5% | 1.1% | 3.1% |  |  |  |
| Heard malaria messages on radio | No | 33.3% | 5.3% | 12.5% | 2.1% | 32.0% | 4.1% | 6.7% | 1.1% | 2.9% | 24.212a | **0.002** | -0.032 |
| Yes | 36.3% | 3.5% | 11.7% | 4.1% | 34.1% | 2.9% | 3.9% | 1.4% | 2.3% |  |  |  |
| Heard malaria messages on: tv | No | 27.2% | 4.2% | 12.4% | 2.0% | 38.4% | 3.9% | 7.3% | 1.3% | 3.2% | 210.798a | **0.000** | -0.240 |
| Yes | 49.8% | 6.6% | 12.2% | 3.7% | 18.4% | 3.7% | 3.2% | 0.8% | 1.7% |  |  |  |
| Heard malaria messages on: poster/billboard | No | 33.6% | 4.8% | 12.3% | 2.5% | 32.7% | 3.9% | 6.2% | 1.2% | 2.7% | 21.717a | **0.005** | -0.074 |
| Yes | 57.1% | 8.2% | 16.3% |  | 14.3% |  |  |  | 4.1% |  |  |  |
| Heard malaria messages on: newspaper/magazine | No | 33.9% | 4.9% | 12.4% | 2.5% | 32.4% | 3.9% | 6.1% | 1.2% | 2.8% | 3.887a | 0.867 | -0.031 |
| Yes | 100.0% |  |  |  |  |  |  |  |  |  |  |  |
| Heard malaria messages on: leaflet/brochure | No | 33.9% | 4.8% | 12.3% | 2.5% | 32.5% | 3.9% | 6.1% | 1.2% | 2.8% | 11.890a | 0.156 | -0.044 |
| Yes | 55.6% | 22.2% | 22.2% |  |  |  |  |  |  |  |  |  |
| Heard malaria messages on: health worker | No | 33.3% | 5.0% | 12.7% | 2.6% | 32.5% | 3.9% | 6.3% | 1.2% | 2.5% | 11.732a | 0.164 | -0.018 |
| Yes | 37.9% | 4.1% | 10.4% | 2.2% | 31.8% | 3.5% | 4.8% | 1.1% | 4.3% |  |  |  |
| Heard malaria messages on: CHW | No | 34.6% | 5.0% | 12.9% | 2.5% | 31.1% | 3.9% | 6.1% | 1.2% | 2.6% | 37.595a | **0.000** | 0.066 |
| Yes | 26.4% | 3.0% | 6.1% | 2.2% | 48.5% | 3.5% | 5.6% | 0.4% | 4.3% |  |  |  |
| Heard malaria messages on: community volunteer/CBA | No | 34.4% | 5.0% | 12.5% | 2.3% | 31.9% | 3.9% | 6.1% | 1.2% | 2.7% | 77.901a | **0.000** | 0.066 |
| Yes | 2.6% |  | 2.6% | 18.4% | 71.1% |  |  |  | 5.3% |  |  |  |
| Heard malaria messages on: word of mouth | No | 34.5% | 5.2% | 12.6% | 2.0% | 31.6% | 4.0% | 6.1% | 1.3% | 2.7% | 56.170a | **0.000** | 0.035 |
| Yes | 29.0% | 1.5% | 9.3% | 7.7% | 41.3% | 1.9% | 5.4% |  | 3.9% |  |  |  |
| Heard malaria messages on: community event/durbar meeting | No | 33.9% | 4.9% | 12.3% | 2.4% | 32.5% | 3.9% | 6.1% | 1.2% | 2.8% | 23.894a | **0.002** | -0.024 |
| Yes | 41.7% |  | 12.5% | 16.7% | 25.0% | 4.2% |  |  |  |  |  |  |
| Heard malaria messages on: anywhere else | No | 34.2% | 4.9% | 12.3% | 2.5% | 32.3% | 3.8% | 6.1% | 1.2% | 2.7% | 12.262a | 0.140 | 0.045 |
| Yes | 11.8% | 2.9% | 20.6% |  | 47.1% | 5.9% | 5.9% |  | 5.9% |  |  |  |
| Heard malaria messages on: don't remember | No | 34.0% | 4.9% | 12.4% | 2.5% | 32.4% | 3.9% | 6.1% | 1.2% | 2.8% | 2.085a | 0.978 | 0.013 |
| Yes |  |  |  |  | 100.0% |  |  |  |  |  |  |  |
| Have seen or heard malaria messages on the radio | No | 31.8% | 5.0% | 12.8% | 2.0% | 32.8% | 4.2% | 7.1% | 1.2% | 3.1% | 37.075a | **0.000** | -0.084 |
| Yes | 39.2% | 4.6% | 11.3% | 3.7% | 31.6% | 3.0% | 3.6% | 1.0% | 2.0% |  |  |  |
|  |  |  |  |  |  |  |  |  |  |  |  |  |  |
| Have seen or heard malaria messages on the tv | No | 26.3% | 4.1% | 12.4% | 2.0% | 39.4% | 3.8% | 7.5% | 1.4% | 3.1% | 228.496a | **0.000** | -0.247 |
| Yes | 48.9% | 6.5% | 12.2% | 3.5% | 18.9% | 3.9% | 3.3% | 0.7% | 2.1% |  |  |  |
| Have seen or heard malaria messages on a poster/billboard | No | 31.5% | 4.6% | 12.3% | 2.6% | 34.4% | 4.1% | 6.5% | 1.2% | 2.8% | 114.623a | **0.000** | -0.182 |
| Yes | 59.2% | 8.2% | 12.7% | 1.5% | 12.4% | 1.9% | 1.1% | 1.1% | 1.9% |  |  |  |
| Have seen or heard malaria messages in a newspaper/magazine | No | 33.8% | 4.8% | 12.2% | 2.5% | 32.7% | 3.9% | 6.1% | 1.2% | 2.8% | 21.368a | **0.006** | -0.058 |
| Yes | 48.3% | 10.3% | 31.0% |  | 6.9% | 3.4% |  |  |  |  |  |  |
| Have seen or heard malaria messages on a leaflet/brochure | No | 33.7% | 4.8% | 12.3% | 2.5% | 32.8% | 3.9% | 6.1% | 1.2% | 2.7% | 28.566a | **0.000** | -0.053 |
| Yes | 52.3% | 11.4% | 15.9% |  | 6.8% | 4.5% |  |  | 9.1% |  |  |  |
| Have seen or heard malaria messages from a health worker | No | 32.6% | 5.3% | 12.8% | 2.6% | 32.3% | 4.0% | 6.9% | 1.2% | 2.3% | 19.874a | **0.011** | -0.034 |
| Yes | 37.2% | 4.1% | 11.4% | 2.3% | 32.6% | 3.5% | 4.2% | 1.0% | 3.7% |  |  |  |
| Have seen or heard malaria messages from a CHW | No | 34.7% | 5.1% | 13.0% | 2.3% | 30.9% | 4.0% | 6.0% | 1.3% | 2.6% | 31.986a | **0.000** | 0.053 |
| Yes | 29.5% | 3.4% | 8.7% | 3.4% | 41.4% | 3.0% | 6.6% | 0.2% | 3.7% |  |  |  |
| Have seen or heard malaria messages from a community volunteer/CBA | No | 34.6% | 4.9% | 12.5% | 2.1% | 32.0% | 3.9% | 6.0% | 1.2% | 2.8% | 56.304a | **0.000** | 0.053 |
| Yes | 18.2% | 4.5% | 8.2% | 11.8% | 44.5% | 3.6% | 6.4% |  | 2.7% |  |  |  |
| Have seen or heard malaria messages from word of mouth | No | 34.4% | 5.5% | 13.3% | 1.8% | 29.8% | 3.9% | 6.8% | 1.5% | 3.0% | 74.563a | **0.000** | 0.016 |
| Yes | 32.6% | 2.8% | 9.1% | 4.8% | 40.9% | 3.7% | 3.8% | 0.1% | 2.1% |  |  |  |
| Have seen or heard malaria messages at a community event/durbar meeting | No | 33.8% | 4.9% | 12.2% | 2.4% | 32.7% | 3.8% | 6.1% | 1.2% | 2.8% | 9.319a | 0.316 | -0.042 |
| Yes | 41.6% | 5.6% | 15.7% | 4.5% | 23.6% | 4.5% | 3.4% |  | 1.1% |  |  |  |
| Messages seen/heard in past 6 months: if have fever go to health facility | No | 34.1% | 5.0% | 12.8% | 2.4% | 31.9% | 3.9% | 6.1% | 1.2% | 2.7% | 8.514a | 0.385 | 0.018 |
| Yes | 32.5% | 4.2% | 8.5% | 3.2% | 37.8% | 3.5% | 5.7% | 1.1% | 3.5% |  |  |  |
| Messages seen/heard in past 6 months: sleep under an insecticide-treated mosquito net | No | 31.0% | 4.6% | 13.2% | 1.9% | 33.8% | 4.1% | 7.0% | 1.3% | 3.0% | 32.067a | **0.000** | -0.083 |
| Yes | 38.3% | 5.3% | 11.0% | 3.4% | 30.4% | 3.5% | 4.7% | 0.9% | 2.5% |  |  |  |
| Messages seen/heard in past 6 months: pregnant women should take drugs to prevent malaria | No | 33.5% | 4.9% | 12.5% | 2.5% | 32.5% | 4.0% | 6.2% | 1.1% | 2.8% | 12.815a | 0.118 | -0.048 |
| Yes | 45.7% | 4.7% | 8.5% | 1.6% | 31.8% | 1.6% | 2.3% | 1.6% | 2.3% |  |  |  |
| Messages seen/heard in past 6 months: SP protects pregnant women and unborn baby from getting malaria | No | 34.1% | 5.0% | 12.5% | 2.2% | 32.2% | 3.9% | 6.1% | 1.2% | 2.8% | 40.565a | **0.000** | 0.010 |
| Yes | 30.0% |  | 7.1% | 12.9% | 41.4% | 4.3% | 2.9% |  | 1.4% |  |  |  |
| Messages seen/heard in past 6 months: always test before treating malaria | No | 33.0% | 5.2% | 12.4% | 1.8% | 33.2% | 4.1% | 6.5% | 1.2% | 2.7% | 64.840a | **0.000** | -0.067 |
| Yes | 41.6% | 2.9% | 12.2% | 7.6% | 26.5% | 2.3% | 2.6% | 0.9% | 3.5% |  |  |  |
| Messages seen/heard in past 6 months: treat malaria with ACTs | No | 33.6% | 4.8% | 12.3% | 2.3% | 33.0% | 3.8% | 6.2% | 1.1% | 2.8% | 35.307a | **0.000** | -0.058 |
| Yes | 46.2% | 6.7% | 12.5% | 6.7% | 16.3% | 5.8% | 1.0% | 3.8% | 1.0% |  |  |  |
| Messages seen/heard in past 6 months: malaria kills | No | 33.2% | 5.2% | 12.3% | 2.2% | 32.9% | 3.8% | 6.4% | 1.2% | 2.8% | 24.444a | **0.002** | -0.046 |
| Yes | 40.2% | 2.3% | 12.5% | 5.0% | 28.6% | 4.1% | 3.8% | 0.9% | 2.6% |  |  |  |
| Messages seen/heard in past 6 months: keep surroundings clean | No | 34.0% | 4.8% | 12.4% | 2.6% | 32.4% | 3.8% | 6.1% | 1.2% | 2.8% | 5.725a | 0.678 | -0.002 |
| Yes | 34.3% | 8.1% | 10.1% |  | 33.3% | 5.1% | 5.1% | 1.0% | 3.0% |  |  |  |
| Messages seen/heard in past 6 months: other | No | 34.1% | 5.0% | 12.2% | 2.5% | 32.5% | 3.9% | 6.0% | 1.2% | 2.6% | 27.872a | **0.000** | 0.022 |
| Yes | 29.8% |  | 19.3% | 3.5% | 26.3% |  | 7.0% | 1.8% | 12.3% |  |  |  |
| Messages seen/heard in past 6 months: don't know/remember | No | 34.1% | 4.9% | 12.4% | 2.5% | 32.4% | 3.9% | 6.1% | 1.1% | 2.7% | 25.504a | **0.001** | 0.040 |
| Yes | 17.6% | 5.9% | 5.9% |  | 41.2% | 5.9% |  | 11.8% | 11.8% |  |  |  |

*This table summarizes the frequency distribution of individuals who have seen or heard malaria-related information, providing baseline data to contextualize subgroup analyses in Supplementary Tables A and B."*

Crosstabulation between Regions among information about malaria message (Supplementary Table B)

| *Statement* | *Level* | *WR* | *CR* | *GA* | *VR* | *ER* | *AR* | *BA* | *NR* | *UE* | *UW* |  | Sig |  |
| --- | --- | --- | --- | --- | --- | --- | --- | --- | --- | --- | --- | --- | --- | --- |
| Seen or heard any messages about malaria in past 6 months | No | 9.7% | 9.7% | 5.1% | 8.5% | 9.2% | 8.4% | 9.8% | 17.5% | 8.9% | 13.1% | 57.185a | 0.000 | -0.052 |
| Yes | 9.8% | 8.5% | 10.3% | 8.1% | 7.8% | 11.9% | 9.5% | 15.4% | 10.3% | 8.3% |  |  |  |
| Heard malaria messages on: radio | No | 9.6% | 9.2% | 8.6% | 8.6% | 9.3% | 9.8% | 9.7% | 14.7% | 8.9% | 11.7% | 59.492a | 0.000 | 0.021 |
| Yes | 10.5% | 8.6% | 5.6% | 7.5% | 5.6% | 12.3% | 9.5% | 22.2% | 12.3% | 6.0% |  |  |  |
| Heard malaria messages on: tv | No | 7.9% | 8.5% | 3.9% | 9.1% | 8.2% | 7.3% | 10.8% | 18.1% | 12.0% | 14.1% | 393.762a | 0.000 | -0.265 |
| Yes | 14.2% | 10.3% | 17.4% | 6.5% | 9.0% | 17.5% | 6.9% | 12.2% | 4.3% | 1.8% |  |  |  |
| Heard malaria messages on: poster/billboard | No | 9.7% | 9.2% | 7.9% | 8.3% | 8.6% | 9.7% | 9.7% | 16.6% | 9.8% | 10.6% | 88.179a | 0.000 | -0.056 |
| Yes | 16.3% | 2.0% | 12.2% | 10.2% | 2.0% | 46.9% | 6.1% | 2.0% | 2.0% |  |  |  |  |
| Heard malaria messages on: newspaper/magazine | No | 9.8% | 9.1% | 7.9% | 8.3% | 8.5% | 10.3% | 9.6% | 16.4% | 9.7% | 10.5% | 17.330a | 0.044 | -0.001 |
| Yes |  |  |  |  |  | 100.0% |  |  |  |  |  |  |  |
| Heard malaria messages on: leaflet/brochure | No | 9.7% | 9.1% | 7.9% | 8.3% | 8.5% | 10.2% | 9.6% | 16.4% | 9.7% | 10.5% | 27.073a | 0.001 | -0.017 |
| Yes | 22.2% |  |  |  |  | 55.6% | 22.2% |  |  |  |  |  |  |
| Heard malaria messages on: health worker | No | 9.2% | 8.8% | 8.9% | 7.7% | 8.8% | 10.2% | 9.6% | 17.3% | 8.9% | 10.7% | 59.368a | 0.000 | -0.016 |
| Yes | 13.2% | 10.4% | 2.6% | 11.7% | 6.5% | 11.0% | 10.0% | 11.0% | 14.3% | 9.3% |  |  |  |
| Heard malaria messages on: CHW | No | 9.9% | 8.9% | 8.4% | 8.5% | 8.9% | 10.9% | 9.6% | 15.8% | 8.6% | 10.5% | 83.891a | 0.000 | 0.089 |
| Yes | 8.2% | 10.4% | 2.6% | 6.1% | 3.0% | 3.5% | 10.0% | 22.9% | 22.9% | 10.4% |  |  |  |
| Heard malaria messages on: community volunteer/CBA | No | 9.9% | 9.2% | 8.0% | 8.4% | 8.6% | 10.4% | 9.7% | 15.7% | 9.6% | 10.5% | 73.853a | 0.000 | 0.091 |
| Yes |  |  |  | 2.6% |  | 7.9% |  | 63.2% | 18.4% | 7.9% |  |  |  |
| Heard malaria messages on: word of mouth | No | 9.6% | 9.6% | 8.6% | 8.2% | 8.9% | 9.8% | 9.8% | 15.4% | 10.0% | 10.1% | 70.469a | 0.000 | 0.058 |
| Yes | 12.0% | 3.5% | 1.2% | 9.7% | 3.5% | 16.2% | 7.3% | 26.3% | 6.6% | 13.9% |  |  |  |
| Heard malaria messages on: community event/durbar meeting | No | 9.7% | 9.1% | 8.0% | 8.3% | 8.5% | 10.3% | 9.6% | 16.2% | 9.8% | 10.5% | 17.958a | 0.036 | -0.023 |
| Yes | 25.0% |  |  | 12.5% | 8.3% | 12.5% | 12.5% | 29.2% |  |  |  |  |  |
| Heard malaria messages on: anywhere else | No | 9.9% | 9.1% | 7.9% | 8.2% | 8.5% | 10.5% | 9.7% | 16.4% | 9.4% | 10.5% | 46.217a | 0.000 | 0.030 |
| Yes | 2.9% | 8.8% | 8.8% | 20.6% | 2.9% |  |  | 8.8% | 38.2% | 8.8% |  |  |  |
| Heard malaria messages on: don't remember | No | 9.8% | 9.1% | 7.9% | 8.3% | 8.5% | 10.4% | 9.6% | 16.4% | 9.7% | 10.4% | 8.570a | 0.478 | 0.028 |
| Yes |  |  |  |  |  |  |  |  |  | 100.0% |  |  |  |
| Have seen or heard malaria messages on the radio | No | 9.9% | 8.3% | 8.2% | 8.6% | 8.1% | 10.3% | 10.1% | 15.2% | 9.2% | 12.0% | 33.445a | 0.000 | -0.024 |
| Yes | 9.5% | 10.9% | 7.2% | 7.6% | 9.3% | 10.4% | 8.5% | 19.0% | 10.9% | 6.7% |  |  |  |
| Have seen or heard malaria messages on the tv | No | 7.9% | 7.9% | 3.9% | 8.7% | 7.6% | 7.6% | 10.8% | 18.5% | 12.4% | 14.7% | 365.534a | 0.000 | -0.281 |
| Yes | 13.4% | 11.4% | 15.8% | 7.5% | 10.1% | 15.7% | 7.2% | 12.2% | 4.5% | 2.3% |  |  |  |
| Have seen or heard malaria messages on a poster/billboard | No | 9.8% | 8.1% | 7.6% | 8.4% | 6.9% | 10.0% | 9.9% | 17.4% | 10.5% | 11.4% | 192.777a | 0.000 | -0.170 |
| Yes | 9.4% | 19.1% | 11.2% | 7.9% | 24.0% | 13.9% | 6.4% | 6.0% | 1.1% | 1.1% |  |  |  |
| Have seen or heard malaria messages in a newspaper/magazine | No | 9.8% | 8.9% | 7.9% | 8.3% | 8.3% | 10.4% | 9.7% | 16.4% | 9.8% | 10.6% | 25.435a | 0.003 | -0.059 |
| Yes | 6.9% | 24.1% | 10.3% | 13.8% | 24.1% | 6.9% | 3.4% | 10.3% |  |  |  |  |  |
| Have seen or heard malaria messages on a leaflet/brochure | No | 9.8% | 8.8% | 7.9% | 8.4% | 8.3% | 10.3% | 9.6% | 16.5% | 9.8% | 10.6% | 39.765a | 0.000 | -0.072 |
| Yes | 6.8% | 29.5% | 9.1% | 4.5% | 18.2% | 15.9% | 9.1% | 6.8% |  |  |  |  |  |
| Have seen or heard malaria messages from a health worker | No | 8.9% | 8.6% | 9.6% | 7.2% | 8.6% | 10.1% | 10.7% | 16.6% | 8.8% | 10.9% | 57.642a | 0.000 | -0.019 |
| Yes | 11.7% | 10.1% | 4.1% | 11.0% | 8.1% | 11.0% | 7.2% | 15.8% | 11.6% | 9.3% |  |  |  |
| Have seen or heard malaria messages from a CHW | No | 10.1% | 8.6% | 8.8% | 8.1% | 9.0% | 11.3% | 10.0% | 16.0% | 8.1% | 10.1% | 94.133a | 0.000 | 0.086 |
| Yes | 8.0% | 11.4% | 3.0% | 9.6% | 5.5% | 4.8% | 7.6% | 18.3% | 19.0% | 12.8% |  |  |  |
| Have seen or heard malaria messages from a community volunteer/CBA | No | 10.0% | 9.0% | 8.2% | 8.4% | 8.6% | 10.6% | 9.8% | 15.3% | 9.4% | 10.6% | 75.555a | 0.000 | 0.071 |
| Yes | 4.5% | 10.0% | 1.8% | 5.5% | 4.5% | 4.5% | 3.6% | 42.7% | 16.4% | 6.4% |  |  |  |
| Have seen or heard malaria messages from word of mouth | No | 8.8% | 9.6% | 9.6% | 8.8% | 9.1% | 10.1% | 11.1% | 13.2% | 10.4% | 9.4% | 150.369a | 0.000 | 0.069 |
| Yes | 13.1% | 7.5% | 2.5% | 6.8% | 6.5% | 11.1% | 4.9% | 26.4% | 7.3% | 13.9% |  |  |  |
| Have seen or heard malaria messages at a community event/durbar meeting | No | 9.6% | 9.0% | 7.9% | 8.2% | 8.3% | 10.4% | 9.7% | 16.4% | 9.7% | 10.7% | 16.264a | 0.062 | -0.062 |
| Yes | 15.7% | 11.2% | 10.1% | 12.4% | 12.4% | 7.9% | 5.6% | 14.6% | 7.9% | 2.2% |  |  |  |
| Messages seen/heard in past 6 months: if have fever go to health facility | No | 9.1% | 9.2% | 7.8% | 8.9% | 9.0% | 11.2% | 9.6% | 14.6% | 9.4% | 11.3% | 131.941a | 0.000 | -0.005 |
| Yes | 16.6% | 8.1% | 9.2% | 2.8% | 3.5% | 1.8% | 10.2% | 32.9% | 12.4% | 2.5% |  |  |  |
| Messages seen/heard in past 6 months: sleep under an insecticide-treated mosquito net | No | 8.6% | 10.2% | 7.4% | 8.3% | 10.3% | 7.1% | 9.0% | 16.3% | 10.6% | 12.3% | 96.911a | 0.000 | -0.052 |
| Yes | 11.5% | 7.4% | 8.8% | 8.3% | 5.8% | 15.1% | 10.6% | 16.4% | 8.3% | 7.7% |  |  |  |
| Messages seen/heard in past 6 months: pregnant women should take drugs to prevent malaria | No | 9.5% | 9.2% | 8.1% | 8.6% | 8.5% | 9.7% | 9.4% | 16.3% | 9.8% | 10.8% | 56.690a | 0.000 | -0.020 |
| Yes | 15.5% | 5.4% | 3.1% | 1.6% | 8.5% | 24.8% | 14.7% | 16.3% | 7.0% | 3.1% |  |  |  |
| Messages seen/heard in past 6 months: SP protects pregnant women and unborn baby from getting malaria | No | 9.8% | 9.1% | 8.1% | 8.5% | 8.5% | 10.5% | 9.6% | 15.6% | 9.7% | 10.6% | 57.445a | 0.000 | 0.039 |
| Yes | 8.6% | 8.6% |  | 2.9% | 5.7% | 4.3% | 11.4% | 47.1% | 8.6% | 2.9% |  |  |  |
| Messages seen/heard in past 6 months: always test before treating malaria | No | 9.7% | 8.9% | 6.8% | 8.8% | 8.9% | 9.4% | 10.3% | 15.9% | 9.9% | 11.2% | 100.103a | 0.000 | -0.062 |
| Yes | 10.5% | 9.9% | 16.6% | 4.4% | 4.9% | 17.7% | 4.1% | 19.5% | 8.1% | 4.4% |  |  |  |
| Messages seen/heard in past 6 months: treat malaria with ACTs | No | 9.6% | 8.7% | 7.7% | 8.5% | 8.6% | 10.3% | 9.8% | 16.4% | 9.7% | 10.7% | 33.172a | 0.000 | -0.069 |
| Yes | 15.4% | 18.3% | 15.4% | 2.9% | 4.8% | 10.6% | 5.8% | 14.4% | 8.7% | 3.8% |  |  |  |
| Messages seen/heard in past 6 months: malaria kills | No | 9.1% | 8.6% | 8.0% | 8.3% | 8.5% | 10.8% | 10.0% | 16.3% | 9.5% | 10.8% | 28.974a | 0.001 | -0.051 |
| Yes | 15.2% | 12.2% | 7.0% | 8.5% | 8.2% | 6.7% | 6.4% | 16.6% | 11.4% | 7.9% |  |  |  |
| Messages seen/heard in past 6 months: keep surroundings clean | No | 9.9% | 9.1% | 7.8% | 8.2% | 8.0% | 10.6% | 9.8% | 16.6% | 9.4% | 10.5% | 53.544a | 0.000 | -0.002 |
| Yes | 5.1% | 8.1% | 10.1% | 12.1% | 23.2% | 2.0% | 4.0% | 8.1% | 18.2% | 9.1% |  |  |  |
| Messages seen/heard in past 6 months: other | No | 9.9% | 9.2% | 8.0% | 8.1% | 8.1% | 10.6% | 9.6% | 16.5% | 9.6% | 10.6% | 54.809a | 0.000 | 0.000 |
| Yes | 5.3% | 1.8% | 3.5% | 21.1% | 28.1% |  | 8.8% | 10.5% | 15.8% | 5.3% |  |  |  |
| Messages seen/heard in past 6 months: don't know/remember | No | 9.8% | 9.0% | 7.9% | 8.3% | 8.4% | 10.4% | 9.6% | 16.4% | 9.7% | 10.4% | 14.459a | 0.107 | 0.001 |
| Yes |  | 11.8% | 5.9% | 17.6% | 23.5% | 5.9% | 5.9% | 5.9% |  | 23.5% |  |  |  |

*Note: Western (WR); Central (CR); Greater Accra (GA); Volta (VR); Eastern (ER); Ashanti (AR); Brong Ahafo (BA); Northern (NR); Upper East (UE); Upper West (UW)*

*This table summarizes the frequency distribution of individuals who have seen or heard malaria-related information, providing baseline data to contextualize subgroup analyses in Supplementary Tables A and B."*

Frequency distribution of seen /heard of information on malaria only(Supplementary Table C)

| Item | N | % |  | Sig |
| --- | --- | --- | --- | --- |
| Seen/heard: |  |  |  |  |
| Goodlife campaign recommending pregnant women to sleep under treated bed nets |  |  |  |  |
| No | 1806 | 60.1 | 2234.671 | 0.000 |
| Yes, on Television | 749 | 24.9 |  |  |
| Yes, on radio | 298 | 9.9 |  |  |
| Yes, on Television and radio | 151 | 5 |  |  |
| Goodlife campaign recommending sleeping under treated bed nets every night all through the night |  |  |  |  |
| No | 1779 | 59.2 | 2158.719 | 0.000 |
| Yes, on Television | 776 | 25.8 |  |  |
| Yes, on radio | 293 | 9.8 |  |  |
| Yes, on Television and radio | 156 | 5.2 |  |  |
| Advert about "My net my life" |  |  |  |  |
| No | 2292 | 76.3 | 4391.824 | 0.000 |
| Yes, on Television | 534 | 17.8 |  |  |
| Yes, on radio | 90 | 3 |  |  |
| Yes, on Television and radio | 88 | 2.9 |  |  |
| Advert where people were asked to test first before treated |  |  |  |  |
| No | 1864 | 62.1 | 2464.205 | 0.000 |
| Yes, on Television | 741 | 24.7 |  |  |
| Yes, on radio | 241 | 8 |  |  |
| Yes, on TV and radio | 158 | 5.3 |  |  |
| Advert on use of acts/malaria meds in past 6 months |  |  |  |  |
| No | 2084 | 69.4 | 451.031 | 0.001 |
| Yes | 920 | 30.6 |  |  |
| Source of message on use of acts/malaria meds: |  |  |  |  |
| Television |  |  |  |  |
| No | 2350 | 78.2 | 957.529 | 0.001 |
| Yes | 654 | 21.8 |  |  |
| Radio |  |  |  |  |
| No | 2743 | 91.3 | 2050.707 | 0.000 |
| Yes | 261 | 8.7 |  |  |
| Newspaper/magazine |  |  |  |  |
| No | 3004 | 100 | 2050.707 | 0.000 |
| Poster/leaflets |  |  |  |  |
| No | 2991 | 99.6 | 2952.225 | 0.000 |
| Yes | 13 | 0.4 |  |  |
| Billboard |  |  |  |  |
| No | 3000 | 99.9 | 2988.021 | 0.000 |
| Yes | 4 | 0.1 |  |  |
| Ways to protect against malaria: |  |  |  |  |
| Sleep under a mosquito net |  |  |  |  |
| No | 1741 | 58 | 76.06 | 0.001 |
| Yes | 1263 | 42 |  |  |
| Sleep under an ITN |  |  |  |  |
| No | 1708 | 56.9 | 56.506 | 0.001 |
| Yes | 1296 | 43.1 |  |  |
| Use mosquito repellent |  |  |  |  |
| No | 2653 | 88.3 | 1764.049 | 0.000 |
| Yes | 351 | 11.7 |  |  |
| Take preventative medications |  |  |  |  |
| No | 2883 | 96 | 2539.495 | 0.000 |
| Yes | 121 | 4 |  |  |
| Spray house with insecticide |  |  |  |  |
| No | 2584 | 86 | 1558.887 | 0.000 |
| Yes | 420 | 14 |  |  |
| Fill in stagnant waters (puddles) |  |  |  |  |
| No | 2413 | 80.3 | 1105.088 | 0.001 |
| Yes | 591 | 19.7 |  |  |
| Keep surrounding clean |  |  |  |  |
| No | 1613 | 53.7 | 16.406 | 0.001 |
| Yes | 1391 | 46.3 |  |  |
| Put mosquito screen on windows |  |  |  |  |
| No | 2986 | 99.4 | 2932.431 | 0.000 |
| Yes | 18 | 0.6 |  |  |

Variance Inflation Factor (VIF) of medium of hearing and seeing of malaria information (Supplementary Table D)

| Item | VIF |
| --- | --- |
| Heard malaria messages on: radio | 3.419 |
| Heard malaria messages on: tv | 6.365 |
| Heard malaria messages on: poster/billboard | 1.409 |
| Heard malaria messages on: newspaper/magazine | 1.448 |
| Heard malaria messages on: leaflet/brochure | 1.695 |
| Heard malaria messages on: health worker | 1.894 |
| Heard malaria messages on: CHW | 2.152 |
| Heard malaria messages on: community volunteer/CBA | 1.680 |
| Heard malaria messages on: word of mouth | 1.703 |
| Heard malaria messages on: community event/durbar meeting | 1.594 |
| Heard malaria messages on: anywhere else | 1.068 |
| Heard malaria messages on: don't remember | 1.020 |
| Have seen or heard malaria messages on the radio | 3.914 |
| Have seen or heard malaria messages on the tv | 7.031 |
| Have seen or heard malaria messages on a poster/billboard | 1.616 |
| Have seen or heard malaria messages in a newspaper/magazine | 1.180 |
| Have seen or heard malaria messages on a leaflet/brochure | 1.393 |
| Have seen or heard malaria messages from a health worker | 2.751 |
| Have seen or heard malaria messages from a CHW | 2.558 |
| Have seen or heard malaria messages from a community volunteer/CBA | 1.820 |
| Have seen or heard malaria messages from word of mouth | 2.155 |
| Have seen or heard malaria messages at a community event/durbar meeting | 1.550 |
| Messages seen/heard in past 6 months: if have fever go to health facility | 1.264 |
| Messages seen/heard in past 6 months: sleep under an insecticide-treated mosquito net | 2.038 |
| Messages seen/heard in past 6 months: pregnant women should take drugs to prevent malaria | 1.122 |
| Messages seen/heard in past 6 months: SP protects pregnant women and unborn baby from getting malaria | 1.117 |
| Messages seen/heard in past 6 months: always test before treating malaria | 1.264 |
| Messages seen/heard in past 6 months: treat malaria with ACTs | 1.126 |
| Messages seen/heard in past 6 months: malaria kills | 1.248 |
| Messages seen/heard in past 6 months: keep surroundings clean | 1.150 |
| Messages seen/heard in past 6 months: other | 1.063 |
| Messages seen/heard in past 6 months: don't know/remember | 1.038 |
| Age in 5-year groups | 1.099 |
| Highest educational level | 2.296 |
| Religion | 1.041 |
| Ethnicity | 1.049 |
| Region | 1.274 |
| Literacy | 2.128 |
| Type of place of residence | 1.290 |
| Household has: electricity | 1.811 |
| Household has: radio | 1.151 |
| Household has: television | 1.959 |
